# Supplementary material for: Post-mortem magnetic resonance imaging with computed tomography-guided biopsy for foetuses and infants: a prospective, multicentre, cross-sectional study
Source: Springer Nature journal article supplement (doi:10.1186/s12887-022-03519-4), 2022-08-03
Supplement: MOESM1 [file 23332538]

**Additional file 1:** overcalled and undetected abnormalities identified at virtopsy

| <b>Lung</b> |                  |                                    |                                    |
|-------------|------------------|------------------------------------|------------------------------------|
| <b>ID</b>   | <b>Age group</b> | <b>False positive (overcalled)</b> | <b>False negative (undetected)</b> |
| 6           | Infant           | Pulmonary interstitial emphysema   | -                                  |
| 7           | Infant           | Aspiration                         | -                                  |
| 8           | Foetus >24 weeks | -                                  | Lung hypoplasia                    |
| 9           | Infant           | Pneumothorax                       | -                                  |
| 10          | Foetus ≤24 weeks | -                                  | Lung hypoplasia                    |
| 12          | Foetus ≤24 weeks | -                                  | Cystic hygroma                     |
| 15          | Foetus >24 weeks | -                                  | Meconium aspiration                |
| 16          | Foetus >24 weeks | -                                  | Meconium aspiration                |
| 21          | Foetus ≤24 weeks | Other                              | -                                  |
| 23          | Foetus ≤24 weeks | Lung hypoplasia                    | -                                  |
| 29          | Foetus ≤24 weeks | -                                  | Lung hypoplasia                    |
| 30          | Foetus ≤24 weeks | -                                  | Aspiration                         |
| 31          | Foetus ≤24 weeks | -                                  | Aspiration                         |
| 32          | Infant           | Pneumothorax                       | -                                  |
| 38          | Infant           | Aspiration                         | -                                  |
| 39          | Foetus >24 weeks | -                                  | Meconium aspiration                |
| 43          | Foetus >24 weeks | Lung hypoplasia                    | -                                  |
| 47          | Foetus ≤24 weeks | Lung hypoplasia                    | -                                  |
| 49          | Foetus ≤24 weeks | -                                  | Lung hypoplasia                    |
| 55          | Foetus ≤24 weeks | Lung hypoplasia                    | -                                  |
| 56          | Foetus >24 weeks | -                                  | Meconium aspiration                |
| 59          | Foetus ≤24 weeks | -                                  | Lung hypoplasia                    |
| 60          | Foetus >24 weeks | -                                  | Lung hypoplasia                    |
| 66          | Infant           | Lung lesion                        | -                                  |
| 69          | Foetus >24 weeks | -                                  | Meconium aspiration                |
| 79          | Foetus >24 weeks | -                                  | Meconium aspiration                |
| 94          | Foetus ≤24 weeks | Lung hypoplasia                    | -                                  |

| <b>Heart</b> |                  |                                    |                                    |
|--------------|------------------|------------------------------------|------------------------------------|
| <b>ID</b>    | <b>Age group</b> | <b>False positive (overcalled)</b> | <b>False negative (undetected)</b> |
| 8            | Foetus >24 weeks | Other cardiac abnormality          | -                                  |
| 11           | Foetus ≤24 weeks | -                                  | Common arterial trunk              |
| 12           | Foetus ≤24 weeks | Hypoplastic left heart syndrome    | -                                  |
| 17           | Infant           | -                                  | Cardiomyopathy                     |
| 18           | Infant           | Cardiomegaly                       | -                                  |
| 19           | Infant           | Cardiomegaly                       | -                                  |
| 36           | Infant           | -                                  | Myocardial infarction              |
| 38           | Infant           | -                                  | Coarctation                        |
| 44           | Foetus ≤24 weeks | Ventricular septal defect          | -                                  |
| 48           | Foetus >24 weeks | Cardiomegaly                       | -                                  |
| 58           | Foetus >24 weeks | Atrioventricular septal defect     | -                                  |
| 60           | Foetus >24 weeks | Atrial septal defect               | -                                  |
| 65           | Infant           | -                                  | Dilated cardiomyopathy             |
| 68           | Foetus ≤24 weeks | Complex congenital heart disease   | -                                  |
| 69           | Foetus >24 weeks | Biventricular hypertrophy          | -                                  |
| 74           | Foetus ≤24 weeks | Partial anomalous venous drainage  | -                                  |
| 77           | Foetus >24 weeks | Ventricular septal defect          | -                                  |
| 82           | Foetus ≤24 weeks | -                                  | Ventricular septal defect          |
| 86           | Foetus ≤24 weeks | Coarctation                        | -                                  |
| 91           | Foetus ≤24 weeks | -                                  | Ventricular septal defect          |
| 93           | Foetus ≤24 weeks | Cardiomegaly                       | -                                  |
| 106          | Foetus >24 weeks | Ventricular septal defect          | -                                  |
| 107          | Foetus >24 weeks | Atrial septal defect               | -                                  |

| <b>Gastrointestinal system</b> |                  |                                    |                                    |
|--------------------------------|------------------|------------------------------------|------------------------------------|
| <b>ID</b>                      | <b>Age group</b> | <b>False positive (overcalled)</b> | <b>False negative (undetected)</b> |
| 2                              | Infant           | Splenomegaly                       | -                                  |
| 3                              | Foetus >24 weeks | -                                  | Intestinal atresia                 |
| 9                              | Infant           | -                                  | Necrotising enterocolitis          |
| 13                             | Infant           | -                                  | Necrotising enterocolitis          |
| 27                             | Foetus >24 weeks | -                                  | Gastroenteritis                    |
| 30                             | Foetus ≤24 weeks | -                                  | Meckel's Diverticulum              |
| 47                             | Foetus ≤24 weeks | -                                  | Malrotation                        |
| 52                             | Foetus >24 weeks | -                                  | Intestinal atresia                 |
| 53                             | Foetus ≤24 weeks | Malrotation                        | -                                  |
| 58                             | Foetus >24 weeks | Other                              | -                                  |
| 60                             | Foetus >24 weeks | Dilated gut                        | -                                  |
| 67                             | Foetus ≤24 weeks | -                                  | Intestinal atresia                 |
| 73                             | Foetus ≤24 weeks | No spleen                          | -                                  |
| 89                             | Foetus ≤24 weeks | Exomphalos                         | -                                  |
| 102                            | Foetus ≤24 weeks | Malrotation                        | -                                  |

| Brain |                   |                             |                             |
|-------|-------------------|-----------------------------|-----------------------------|
| ID    | Age group         | False positive (overcalled) | False negative (undetected) |
| 2     | Infant            | -                           | Infection                   |
| 3     | Foetus >24 weeks  | Callosal agenesis           | -                           |
| 8     | Foetus >24 weeks  | Neural tube defect          | -                           |
| 12    | Foetus ≤ 24 weeks | Callosal agenesis           | -                           |
| 13    | Infant            | Asphyxia                    | -                           |
| 14    | Foetus ≤24 weeks  | Intracranial bleed          | -                           |
| 21    | Foetus ≤24 weeks  | Callosal agenesis           | -                           |
| 38    | Infant            | -                           | Infection                   |
| 44    | Foetus ≤24 weeks  | Callosal agenesis           | -                           |
| 48    | Foetus >24 weeks  | Asphyxia                    | -                           |
| 49    | Foetus ≤24 weeks  | Intracranial bleed          | -                           |
| 61    | Foetus ≤24 weeks  | -                           | Ischemic brain injury       |
| 77    | Foetus >24 weeks  | Vermis hypoplasia           | -                           |
| 82    | Foetus ≤24 weeks  | Intracranial bleed          | -                           |
| 84    | Foetus ≤24 weeks  | Intracranial bleed          | -                           |
| 96    | Foetus ≤24 weeks  | Callosal agenesis           | -                           |
| 101   | Foetus ≤24 weeks  | Subdural bleed              | -                           |
| 108   | Foetus >24 weeks  | Vascular malformation       | -                           |
| 110   | Foetus >24 weeks  | Intracranial bleed          | -                           |

| Urogenital system |                  |                                 |                                 |
|-------------------|------------------|---------------------------------|---------------------------------|
| ID                | Age group        | False positive (overcalled)     | False negative (undetected)     |
| 38                | Infant           | -                               | Renal developmental abnormality |
| 42                | Foetus ≤24 weeks | Renal agenesis                  | -                               |
| 56                | Foetus >24 weeks | Renal developmental abnormality | -                               |
| 69                | Foetus >24 weeks | -                               | Uterus agenesis                 |
| 74                | Foetus ≤24 weeks | Renal dysplasia                 | -                               |

| Musculoskeletal system |                  |                             |                             |
|------------------------|------------------|-----------------------------|-----------------------------|
| ID                     | Age group        | False positive (overcalled) | False negative (undetected) |
| 7                      | Infant           | -                           | Fracture long bones         |
| 21                     | Foetus ≤24 weeks | Skeletal dysplasia          | -                           |
| 32                     | Infant           | Fracture skull              | -                           |
| 44                     | Foetus ≤24 weeks | Fracture long bones         | -                           |
| 69                     | Foetus >24 weeks | Other                       | -                           |

| Placenta |                  |                             |                             |
|----------|------------------|-----------------------------|-----------------------------|
| ID       | Age group        | False positive (overcalled) | False negative (undetected) |
| 22       | Foetus ≤24 weeks | -                           | Infarction/insufficiency    |
| 33       | Foetus ≤24 weeks | -                           | Placental abruption         |
| 43       | Foetus >24 weeks | -                           | Placental abruption         |
| 84       | Foetus ≤24 weeks | Infarction/insufficiency    | -                           |
| 101      | Foetus ≤24 weeks | Chorioamnionitis/funinitis  | -                           |
| 102      | Foetus ≤24 weeks | Chorioamnionitis/funinitis  | -                           |
| 103      | Foetus ≤24 weeks | Chorioamnionitis/funinitis  | -                           |
| 110      | Foetus >24 weeks | -                           | Other                       |
