# Supplementary material for: Post-mortem magnetic resonance imaging with computed tomography-guided biopsy for foetuses and infants: a prospective, multicentre, cross-sectional study
Source: Springer Nature journal article supplement (doi:10.1186/s12887-022-03519-4), 2022-08-03
Supplement: MOESM2 [file 23332538]

**Additional file 2: Virtopsy Study Group**

| <b>First and middle names, last names</b> | <b>Affiliation</b>                                                                                                 |
|-------------------------------------------|--------------------------------------------------------------------------------------------------------------------|
| Christoph Martin, Rügger                  | Newborn Research, Department of Neonatology, University Hospital and University of Zurich, Switzerland             |
| Hans Ulrich, Bucher                       |                                                                                                                    |
| Claudia, Knöpfli                          |                                                                                                                    |
| Brigitte Maria, Koller                    |                                                                                                                    |
| Jean-Claude, Fauchère                     |                                                                                                                    |
| Rosa Maria, Martinez                      | Institute of Forensic Medicine, University of Zurich, Switzerland                                                  |
| Steffen, Ross                             |                                                                                                                    |
| Christine, Bartsch                        |                                                                                                                    |
| Dominic, Gascho                           |                                                                                                                    |
| Peter Karl, Bode                          | Department of Pathology, University Hospital and University of Zurich, Switzerland                                 |
| Elisabeth, Bruder                         | Pathology, Institute of Medical Genetics and Pathology, University Hospital and University of Basel, Switzerland   |
| Christian, Haslinger                      | Department of Obstetrics, University Hospital and University of Zurich, Switzerland                                |
| Leonhard, Schäffer                        | Department of Obstetrics, Cantonal Hospital Baden, Switzerland                                                     |
| Kevin, Schmid                             | Department of Intensive Care and Neonatology, University Children's Hospital and University of Zurich, Switzerland |
| Bernhard, Frey                            |                                                                                                                    |
| Lisa, Hofer                               | Epidemiology, Biostatistics and Prevention Institute, University of Zurich, Switzerland                            |
| Leonhard, Held                            |                                                                                                                    |
